# Supplementary material for: Gain Without Pain: The Extended Effects of a Behavioral Health Intervention
Source: Atypon-hosted journal article supplement (doi:10.1287/mnsc.2015.2322), 2016-02-16
Supplement: mnsc.2015.2322-sm-online_appendix.pdf [file mnsc.2015.2322-sm-online_appendix.pdf]

## **Online Appendix**

### **Invitation Email**

*Subject: HealthyFood Commitment Survey and Study*

*Dear First Name,*

*We would like to ask for your help by participating in a brief online survey about your grocery shopping habits and **Vitality HealthyFood™**. Currently, XX% of your purchases qualify for the **HealthyFood™** benefit. The study is investigating ways to help members improve that percentage.*

*This survey will take about 10 minutes and, if you complete it, you will be entered into a draw to win a R1000 Pick n Pay gift card.*

**Figure A1.1** Histogram of change (during intervention vs. before intervention periods) in log number of monthly exercise events by experimental condition.

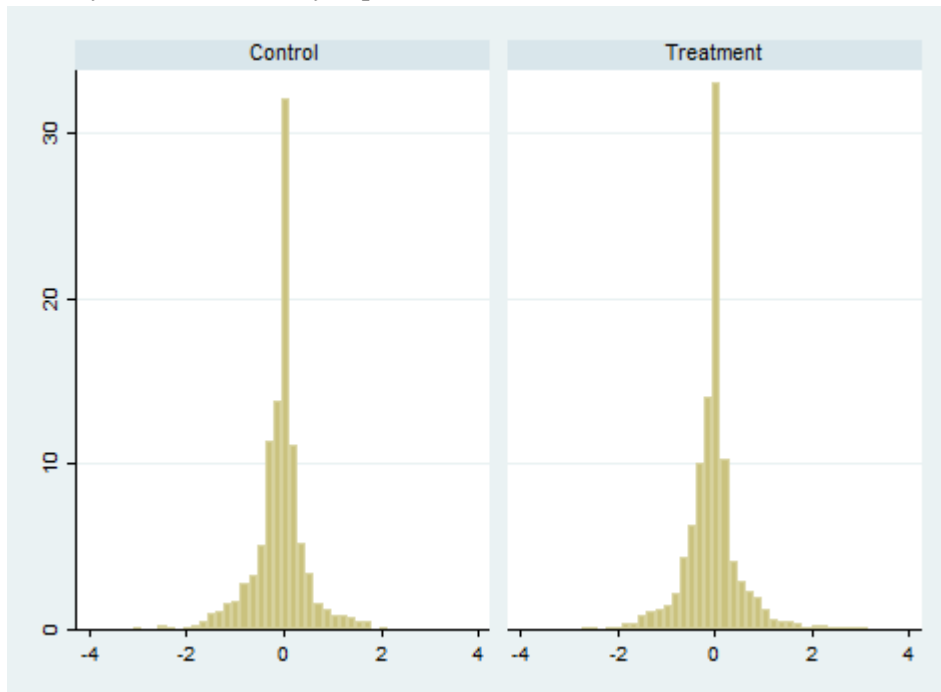

Kolmogorov-Smirnov test for equality of distributions,  $D = 0.02$ ,  $p = 0.91$ .

**Figure A1.2** Histogram of change (during intervention vs. before intervention periods) in log number of monthly exercise events by commitment status.

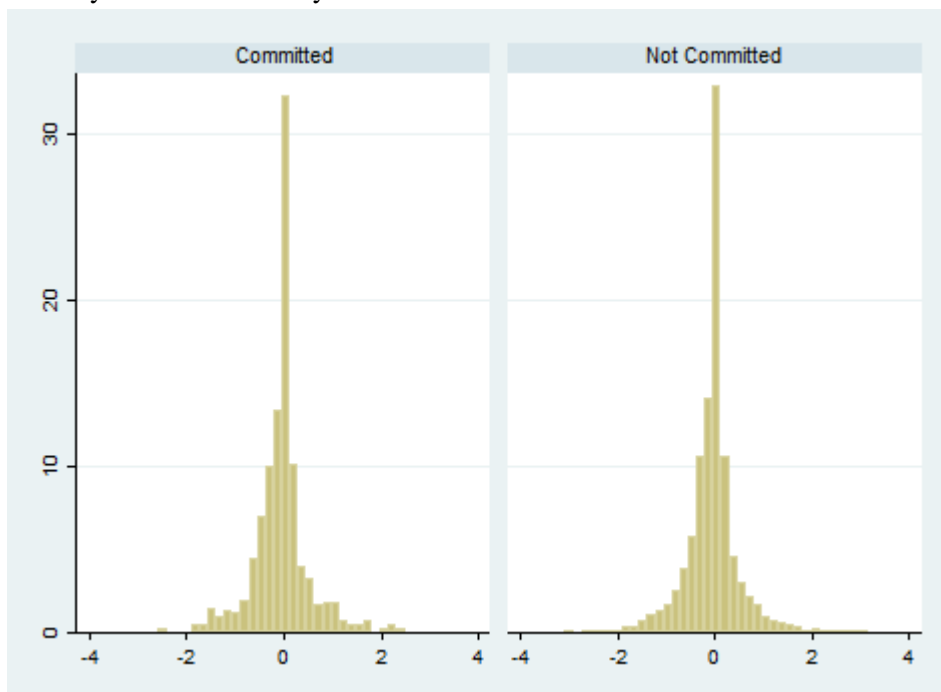

Kolmogorov-Smirnov test for equality of distributions,  $D = 0.03$ ,  $p = 0.76$ .

**Figure A2.1** Histogram of change (after intervention vs. before intervention periods) in log number of monthly points by experimental condition.

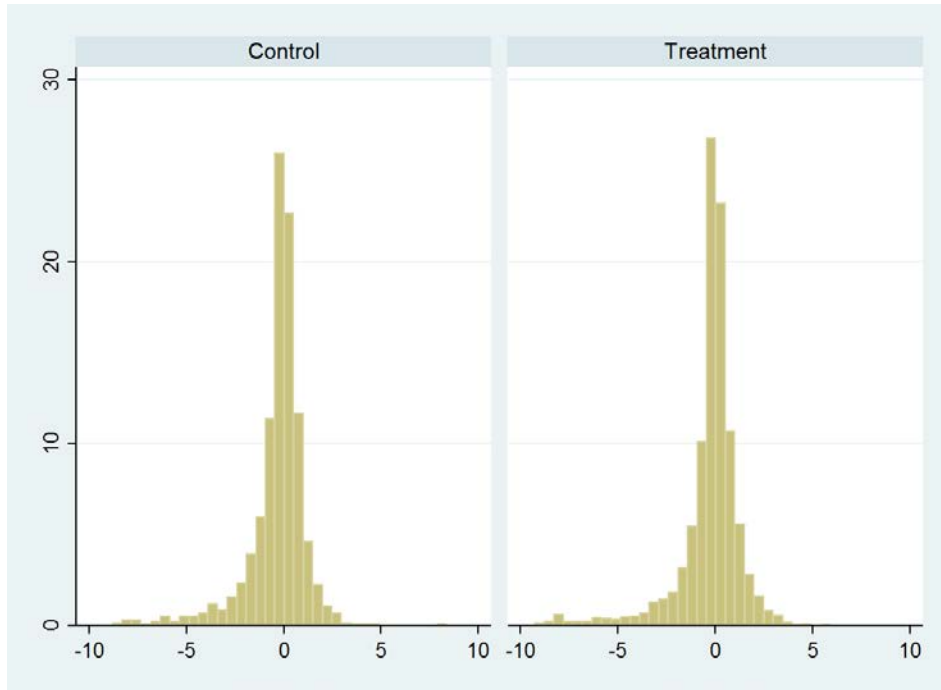

Kolmogorov-Smirnov test for equality of distributions,  $D = 0.05$ ,  $p = 0.02$

**Figure A2.2** Histogram of change (after intervention vs. before intervention periods) in log number of monthly points by commitment status.

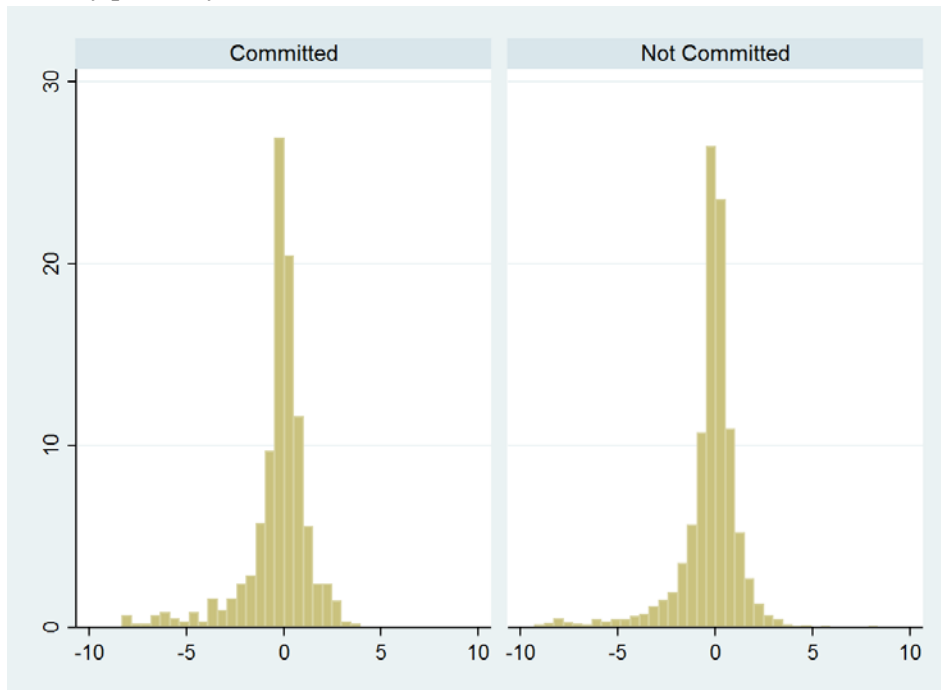

Kolmogorov-Smirnov test for equality of distributions,  $D = 0.02$ ,  $p = 0.91$ .

**Table A1.1** Examples of point earning activities under the Vitality Program

| <b>Activity*</b>                                     | <b>Restriction</b>                              | <b>Points</b>                  |
|------------------------------------------------------|-------------------------------------------------|--------------------------------|
| Learn more about your eating habits from a dietitian | Maximum of 7500 points per year                 | 2500 points per visit          |
| Online fitness assessment                            | Once a year                                     | 1000 points                    |
| Glaucoma screening                                   | Once a year for men and women 40 years and over | 2500 points                    |
| Flu vaccination                                      | Once a year                                     | 1000 points                    |
| Workout at partner gym                               | Maximum of 15,000 points per year               | 150 points per visit           |
| Not smoking                                          | Once a year                                     | 5000 points                    |
| Purchase HealthyFood items                           | Maximum of 1000 points per month                | 20 points per HealthyFood item |

\*The full list of activities is much more extensive. The examples above are provided for expositional purposes.

**Table A1.2** Points needed to reach each status for a single member policy

| <b>Status</b> | <b>Single Member*</b>              | <b>Benefit Examples<sup>+</sup></b>                                                                                                                                                                                                                                                                    |
|---------------|------------------------------------|--------------------------------------------------------------------------------------------------------------------------------------------------------------------------------------------------------------------------------------------------------------------------------------------------------|
| Blue          | 0 points                           | <ul style="list-style-type: none"> <li>• 15% discount on British Airways flights to select cities</li> <li>• 30% discount on select hotels in the Tsogo Sun group</li> <li>• 25% discount on HealthyFood purchased at Pick-n-Pay</li> <li>• 80% discount on club membership at partner gyms</li> </ul> |
| Bronze        | 15,000 points                      | <ul style="list-style-type: none"> <li>• 20% discount on British Airways flights to select cities</li> <li>• 35% discount on select hotels in the Tsogo Sun group</li> <li>• 25% discount on HealthyFood purchased at Pick-n-Pay</li> <li>• 80% discount on club membership at partner gyms</li> </ul> |
| Silver        | 35,000 points                      | <ul style="list-style-type: none"> <li>• 25% discount on British Airways flights to select cities</li> <li>• 40% discount on select hotels in the Tsogo Sun group</li> <li>• 25% discount on HealthyFood purchased at Pick-n-Pay</li> <li>• 80% discount on club membership at partner gyms</li> </ul> |
| Gold          | 45,000 points                      | <ul style="list-style-type: none"> <li>• 30% discount on British Airways flights to select cities</li> <li>• 45% discount on select hotels in the Tsogo Sun group</li> <li>• 25% discount on HealthyFood purchased at Pick-n-Pay</li> <li>• 80% discount on club membership at partner gyms</li> </ul> |
| Diamond       | Reach Gold three consecutive years | <ul style="list-style-type: none"> <li>• 35% discount on British Airways flights to select cities</li> <li>• 50% discount on select hotels in the Tsogo Sun group</li> <li>• 25% discount on HealthyFood purchased at Pick-n-Pay</li> <li>• 80% discount on club membership at partner gyms</li> </ul> |

\*Policies with more members need proportionally more points to reach the same status levels.

<sup>+</sup>The full list of benefits is more extensive. The examples above are provided for expositional purposes.

**Table A2.** Intention to treat analyses of the effect of the intervention on percentage of healthy items purchased during and after the commitment ended split by status level

|                                    | Non Gold<br>Members<br>(Fixed effects) | Gold Members<br>(Fixed effects) | Non Gold<br>Members<br>(Robust SE) | Gold Members<br>(Robust SE) |
|------------------------------------|----------------------------------------|---------------------------------|------------------------------------|-----------------------------|
| Treatment X<br>During Intervention | 0.55**<br>(0.27)                       | 1.23***<br>(0.32)               | 0.41<br>(0.35)                     | 1.20***<br>(0.43)           |
| Treatment X<br>After Intervention  | 0.23<br>(0.28)                         | 1.16***<br>(0.32)               | 0.10<br>(0.44)                     | 1.10**<br>(0.51)            |
| Treatment Condition                |                                        |                                 | -0.05<br>(0.53)                    | -0.47<br>(0.61)             |
| During Intervention                | -1.69***<br>(0.23)                     | -2.08***<br>(0.26)              | -1.39***<br>(0.29)                 | -1.92***<br>(0.34)          |
| After Intervention                 | -1.56***<br>(0.23)                     | -1.96***<br>(0.26)              | -1.16***<br>(0.36)                 | -1.80***<br>(0.40)          |
| Constant                           | 30.78***<br>(0.09)                     | 33.97***<br>(0.10)              | 30.65***<br>(0.45)                 | 34.20***<br>(0.49)          |
| Observations                       | 38094                                  | 29514                           | 38094                              | 29514                       |
| Clusters                           | 2350                                   | 1723                            | 2350                               | 1723                        |

Note. The dependent variable is the percentage of monthly healthy food items purchased. 'Gold Members' includes all gold and diamond members as of January 1, 2012.

\*  $p < .1$ ; \*\*  $p < .05$ ; \*\*\*  $p < .01$

**Table A3.** The effect of change in percentage of healthy items purchased on change in exercise

|                                    | Full Sample     | Non Gold Members | Gold Members    |
|------------------------------------|-----------------|------------------|-----------------|
| Change in percent healthy shopping | 0.02<br>(0.03)  | 0.04<br>(0.07)   | 0.01<br>(0.02)  |
| Constant                           | -0.02<br>(0.04) | 0.01<br>(0.10)   | -0.03<br>(0.03) |
| Observations                       | 4029            | 2315             | 1714            |

Note. The dependent variable is the difference of log monthly exercise events from before the intervention period to during the intervention period. Forty-four members purchased no items from Pick-n-Pay during the intervention period. Because of their missing data, our sample is of 4,029 for these analyses.

\*  $p < .1$ ; \*\*  $p < .05$ ; \*\*\*  $p < .01$

**Table A4.** Intention to treat analyses of the effect of the intervention on exercise during and after the commitment ended split by member status level

|                                    | Non Gold Members<br>(Fixed effects) | Gold Members<br>(Fixed Effects) | Non Gold Members<br>(Robust SE) | Gold Members<br>(Robust SE) |
|------------------------------------|-------------------------------------|---------------------------------|---------------------------------|-----------------------------|
| Treatment X<br>During Intervention | 0.01<br>(0.01)                      | 0.02<br>(0.02)                  | 0.01<br>(0.02)                  | 0.02<br>(0.03)              |
| Treatment X<br>After Intervention  | 0.001<br>(0.01)                     | 0.003<br>(0.02)                 | 0.001<br>(0.03)                 | 0.003<br>(0.03)             |
| Treatment Condition                |                                     |                                 | -0.04<br>(0.05)                 | 0.07<br>(0.05)              |
| During Intervention                | -0.07***<br>(0.01)                  | -0.07***<br>(0.01)              | -0.07***<br>(0.02)              | -0.07***<br>(0.02)          |
| After Intervention                 | -0.01<br>(0.01)                     | 0.01<br>(0.01)                  | -0.01<br>(0.03)                 | 0.01<br>(0.03)              |
| Constant                           | 1.15***<br>(0.005)                  | 1.88***<br>(0.01)               | 1.18***<br>(0.04)               | 1.84***<br>(0.04)           |
| Observations                       | 42300                               | 31014                           | 42300                           | 31014                       |
| Clusters                           | 2350                                | 1723                            | 2350                            | 1723                        |

Note. The dependent variable is the log number of monthly exercise events. ‘Gold Members’ includes all gold and diamond members as of January 1, 2012.

\*  $p < .1$ ; \*\*  $p < .05$ ; \*\*\*  $p < .01$

**Table A5.** The effect of the intervention on long-term customer loyalty measured by change in status

|                        | ATT               | ITT               | Non Gold<br>Members<br>(ATT) | Gold<br>Members<br>(ATT) |
|------------------------|-------------------|-------------------|------------------------------|--------------------------|
| Committed              | 0.07<br>(0.12)    |                   | -0.02<br>(0.18)              | 0.16<br>(0.13)           |
| Treatment<br>Condition |                   | 0.02<br>(0.03)    |                              |                          |
| Constant               | 0.42***<br>(0.02) | 0.40***<br>(0.05) | 0.64***<br>(0.04)            | 0.14***<br>(0.02)        |
| Observations           | 3969              | 3969              | 2267                         | 1702                     |

Note. The dependent variable is the change in status level from the beginning of 2012 to the end of 2013. Status is coded as 1 (blue) to 5 (diamond). Status level was missing for 104 members inactive in 2013, who are excluded from these analyses.

\*  $p < .1$ ; \*\*  $p < .05$ ; \*\*\*  $p < .01$

**Table A6.** Intention to treat analyses of the effect of the intervention on loyalty during and after the commitment ended split by member status level

|                                    | Non Gold Members<br>(Fixed effects) | Gold Members<br>(Fixed Effects) | Non Gold Members<br>(Robust SE) | Gold Members<br>(Robust SE) |
|------------------------------------|-------------------------------------|---------------------------------|---------------------------------|-----------------------------|
| Treatment X<br>During Intervention | 0.05<br>(0.05)                      | 0.08*<br>(0.05)                 | 0.05<br>(0.05)                  | 0.08<br>(0.06)              |
| Treatment X<br>After Intervention  | -0.02<br>(0.05)                     | 0.16***<br>(0.05)               | -0.02<br>(0.08)                 | 0.16**<br>(0.06)            |
| Treatment Condition                |                                     |                                 | 0.01<br>(0.07)                  | -0.02<br>(0.05)             |
| During Intervention                | -0.59***<br>(0.04)                  | -0.64***<br>(0.04)              | -0.59***<br>(0.04)              | -0.64***<br>(0.05)          |
| After Intervention                 | -0.35***<br>(0.04)                  | -0.24***<br>(0.04)              | -0.35***<br>(0.06)              | -0.24***<br>(0.05)          |
| Constant                           | 6.75***<br>(0.02)                   | 8.03***<br>(0.02)               | 6.74***<br>(0.06)               | 8.04***<br>(0.04)           |
| Observations                       | 42300                               | 31014                           | 42300                           | 31014                       |
| Clusters                           | 2350                                | 1723                            | 2350                            | 1723                        |

Note. The dependent variable is the log monthly number of points. ‘Gold Members’ includes all gold and diamond members as of January 1, 2012.

\*  $p < .1$ ; \*\*  $p < .05$ ; \*\*\*  $p < .01$



Note. Experimental condition is used as the instrument for commitment status in the analyses. 'Gold Members' includes all gold and diamond members as of January 1, 2012.

\*  $p < .1$ ; \*\*  $p < .05$ ; \*\*\*  $p < .01$
